# Supplementary material for: Spin crossover FeIII complexes with a substituted Hqnal ligand: effects of anions and solvents
Source: Royal Society of Chemistry journal article supplement (doi:10.1039/d4dt01954g), 2024-01-01
Supplement: d4dt01954g1.pdf [file d4dt01954g1.pdf]

## Supporting Information

# Spin Crossover Fe<sup>III</sup> Complexes with a Substituted Hqnal Ligand: Effects of Anions and Solvents

Feng-Li Chen,<sup>‡</sup> Xin-Li Liu,<sup>‡</sup> Yue Zhao, Gang Li, Bo-Hong Gao, Xin-Yi Wang<sup>\*</sup>

State Key Laboratory of Coordination Chemistry, Collaborative Innovation Center of Advanced Microstructures, School of Chemistry and Chemical Engineering, Nanjing University, Nanjing, 210023, China. Email: [wangxy66@nju.edu.cn](mailto:wangxy66@nju.edu.cn);

## Table of Contents

|                                                                                                                                                                                                                                                                                                                                                                                                                                                                                                         |    |
|---------------------------------------------------------------------------------------------------------------------------------------------------------------------------------------------------------------------------------------------------------------------------------------------------------------------------------------------------------------------------------------------------------------------------------------------------------------------------------------------------------|----|
| <b>Figure S1.</b> $^1\text{H}$ NMR spectrum of ligand in DMSO- $d_6$ .....                                                                                                                                                                                                                                                                                                                                                                                                                              | 5  |
| <b>Figure S2.</b> $^{13}\text{C}$ NMR spectrum of ligand in DMSO- $d_6$ .....                                                                                                                                                                                                                                                                                                                                                                                                                           | 5  |
| <b>Figure S3.</b> Experimental PXRD patterns (red) measured at 300 K and simulated patterns (black) based on single crystal structures for <b>1-4</b> (a-d) and Hqnal-5- $\text{Br}_q$ (e) ; (f) PXRD patterns of the <i>in-situ</i> desolvated sample of <b>3</b> after the magnetic measurement (purple) and the simulated patterns based on the single crystal structure of <b>3·0.6H<sub>2</sub>O</b> (black).....                                                                                  | 6  |
| <b>Figure S4.</b> TGA curves of <b>1-4</b> (a-d) and <b>3·0.6H<sub>2</sub>O</b> (e).....                                                                                                                                                                                                                                                                                                                                                                                                                | 6  |
| <b>Figure S5.</b> UV-visible spectra of <b>1-4</b> and <b>3·0.6H<sub>2</sub>O</b> in $\text{CH}_2\text{Cl}_2$ .....                                                                                                                                                                                                                                                                                                                                                                                     | 7  |
| <b>Figure S6.</b> Asymmetric unit of Hqnal-5- $\text{Br}_q$ at 193 K.....                                                                                                                                                                                                                                                                                                                                                                                                                               | 7  |
| <b>Figure S7.</b> The 2D layers and 3D structure of <b>1</b> : the C–H···O interactions between the $\text{NO}_3^-$ anions and the cations (a) and (b); the C–H···O and $\text{Br}\cdots\text{O}$ interactions between the solvents and the cations (c) and (d).....                                                                                                                                                                                                                                    | 8  |
| <b>Figure S8.</b> The 1D cross-section of complexes <b>2-4</b> (a-c) and <b>3·0.6H<sub>2</sub>O</b> (d). ....                                                                                                                                                                                                                                                                                                                                                                                           | 8  |
| <b>Figure S9.</b> The 1D chain of <b>2</b> : (a) the C–H···O/Cl interactions between the $\text{ClO}_4^-$ anions and the cations; (b) Type A and Type B $\pi\cdots\pi$ interactions and the C–H···O interactions between the cations; (c) the C–H···O interactions between the solvent and the cations; (d) the C–H···Br interactions between the cations.....                                                                                                                                          | 9  |
| <b>Figure S10.</b> The 2D layer of <b>2</b> : (a) the C–H···O interactions between the $\text{ClO}_4^-$ anions and the cations; (b) the C–H···O interactions between the solvents and the cations.....                                                                                                                                                                                                                                                                                                  | 9  |
| <b>Figure S11.</b> 3D structures of <b>2-4</b> and <b>3·0.6H<sub>2</sub>O</b> (a) The C–H···O and $\text{Br}\cdots\text{O}$ interactions between the 2D layers of <b>2</b> ; (b) The C–H···O and $\text{F}\cdots\text{Br}/\pi$ interactions between the 2D layers of <b>3</b> ; (c) The C–H···O and $\text{F}\cdots\text{Br}/\pi$ interactions between the 2D layers of <b>4</b> ; (d) The C–H···O and $\text{Br}\cdots\text{O}$ interactions between the 2D layers of <b>3·0.6H<sub>2</sub>O</b> ..... | 10 |

|                                                                                                                                                                                                                                                                                                                                                                                                                                                                     |    |
|---------------------------------------------------------------------------------------------------------------------------------------------------------------------------------------------------------------------------------------------------------------------------------------------------------------------------------------------------------------------------------------------------------------------------------------------------------------------|----|
| <b>Figure S12.</b> The 1D chain of <b>3</b> : (a) Type A and Type B $\pi \cdots \pi$ interactions and the C–H $\cdots$ O interactions between the cations; (b) the C–H $\cdots$ O/F interactions between the OTf <sup>−</sup> anions and cations; (c) the C–H $\cdots$ O interactions between the solvents and cations.....                                                                                                                                         | 10 |
| <b>Figure S13.</b> The 1D chain of <b>3·0.6H<sub>2</sub>O</b> : (a-b) Type A and Type B $\pi \cdots \pi$ interactions, the C–H $\cdots$ O and the C–H $\cdots$ Br interactions between the cations; (c-d) the C–H $\cdots$ O/F interactions between the OTf <sup>−</sup> anions and the cations.....                                                                                                                                                                | 11 |
| <b>Figure S14.</b> The 1D chain of <b>4</b> : (a) the C–H $\cdots$ O/N and F $\cdots\pi$ interactions between the cations and the NTF <sub>2</sub> <sup>−</sup> anions; (b) Type A and Type B $\pi \cdots \pi$ interactions and the C–H $\cdots$ O interactions between the cations; (c) the C–H $\cdots$ Cl and Cl $\cdots$ Br interactions between the solvents and the cations; (d) the C–H $\cdots$ Br and Br $\cdots\pi$ interactions between the cations..... | 11 |
| <b>Figure S15.</b> Hirshfeld surface 2D fingerprint plots for <b>1-4</b> corresponding to (a)-(d) at low temperature.....                                                                                                                                                                                                                                                                                                                                           | 12 |
| <b>Figure S16.</b> Hirshfeld surface mapped with $d_{\text{norm}}$ and Hirshfeld surface 2D fingerprint plots for all contacts for <b>1-4</b> corresponding to (a)-(d) at low temperature.....                                                                                                                                                                                                                                                                      | 12 |
| <b>Figure S17.</b> Hirshfeld surface 2D fingerprint plots of H $\cdots$ O/O $\cdots$ H corresponding to (a)-(d) and H $\cdots$ H/H $\cdots$ H corresponding to (e)-(h) for <b>1-4</b> at low temperature.....                                                                                                                                                                                                                                                       | 13 |
| <b>Figure S18.</b> PXRD patterns (a) and TGA curves (b) of complex <b>4</b> after different aging times.....                                                                                                                                                                                                                                                                                                                                                        | 13 |
| <b>Figure S19.</b> DSC curves at a sweep rate of 5 K·min <sup>−1</sup> for <b>1</b> (a), <b>2</b> (b) and <b>3</b> (c).....                                                                                                                                                                                                                                                                                                                                         | 13 |
| <b>Table S1.</b> Crystallographic data and structure refinement parameters of <b>1</b> and <b>2</b> .....                                                                                                                                                                                                                                                                                                                                                           | 14 |
| <b>Table S2.</b> Crystallographic data and structure refinement parameters of <b>3</b> and <b>3·0.6H<sub>2</sub>O</b> .....                                                                                                                                                                                                                                                                                                                                         | 15 |
| <b>Table S3.</b> Crystallographic data and structure refinement parameters of <b>4</b> and Hqnal-5-Br <sub>q</sub> .                                                                                                                                                                                                                                                                                                                                                | 16 |
| <b>Table S4.</b> Selected bond lengths (Å), the averaged Fe–O and Fe–N bonds (Å), and octahedral distortion parameters $\Theta$ , $\Sigma$ , and CShM in <b>1, 2 and 3·0.6H<sub>2</sub>O</b> .....                                                                                                                                                                                                                                                                  | 17 |
| <b>Table S5.</b> Selected bond lengths (Å), the averaged Fe–O and Fe–N bonds (Å), and octahedral distortion parameters $\Theta$ , $\Sigma$ , and CShM in <b>3 and 4</b> .....                                                                                                                                                                                                                                                                                       | 17 |
| <b>Table S6.</b> Intermolecular interaction distances at different temperatures of <b>1</b> .....                                                                                                                                                                                                                                                                                                                                                                   | 18 |
| <b>Table S7.</b> Intermolecular interaction distances at 90 K of <b>2</b> .....                                                                                                                                                                                                                                                                                                                                                                                     | 19 |
| <b>Table S8.</b> Intermolecular interaction distances at different temperatures of <b>3</b> .....                                                                                                                                                                                                                                                                                                                                                                   | 20 |
| <b>Table S9.</b> Intermolecular interaction distances at 100 K and 150 K of <b>3·0.6H<sub>2</sub>O</b> .....                                                                                                                                                                                                                                                                                                                                                        | 21 |

|                                                                                                                                           |    |
|-------------------------------------------------------------------------------------------------------------------------------------------|----|
| <b>Table S10.</b> Intermolecular interaction distances at different temperatures of <b>4</b> .....                                        | 22 |
| <b>Table S11.</b> Intermolecular interactions contributions for <b>1-4</b> calculated by Hirshfeld surface at different temperatures..... | 23 |
| <b>Table S12.</b> Parameters of <b>1-3</b> derived from the domain model.....                                                             | 23 |
| <b>Table S13.</b> List of the Fe <sup>III</sup> SCO complexes with the Hqnal ligand without any substituent groups.....                   | 23 |

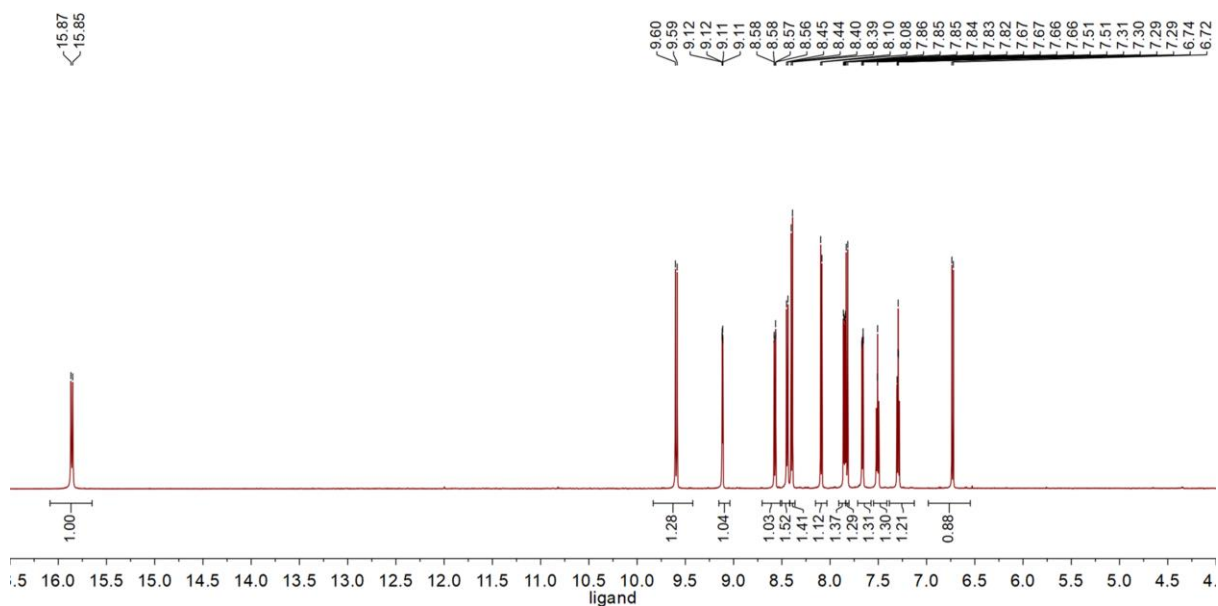

**Figure S1.**  $^1\text{H}$  NMR spectrum of ligand Hqnal-5-Br<sub>q</sub> in DMSO-d<sub>6</sub>:  $\delta = 15.86$  (d,  $J = 11.0$  Hz, 1H), 9.59 (d,  $J = 11.1$  Hz, 1H), 9.12 (dd,  $J = 4.1, 1.6$  Hz, 1H), 8.57 (dd,  $J = 8.5, 1.6$  Hz, 1H), 8.44 (d,  $J = 8.3$  Hz, 1H), 8.40 (d,  $J = 8.4$  Hz, 1H), 8.09 (d,  $J = 8.3$  Hz, 1H), 7.85 (dd,  $J = 8.5, 4.1$  Hz, 1H), 7.82 (d,  $J = 9.4$  Hz, 1H), 7.66 (dd,  $J = 7.8, 1.4$  Hz, 1H), 7.51 (d,  $J = 1.4$  Hz, 1H), 7.39–7.13 (m, 1H), 6.73 (d,  $J = 9.4$  Hz, 1H).

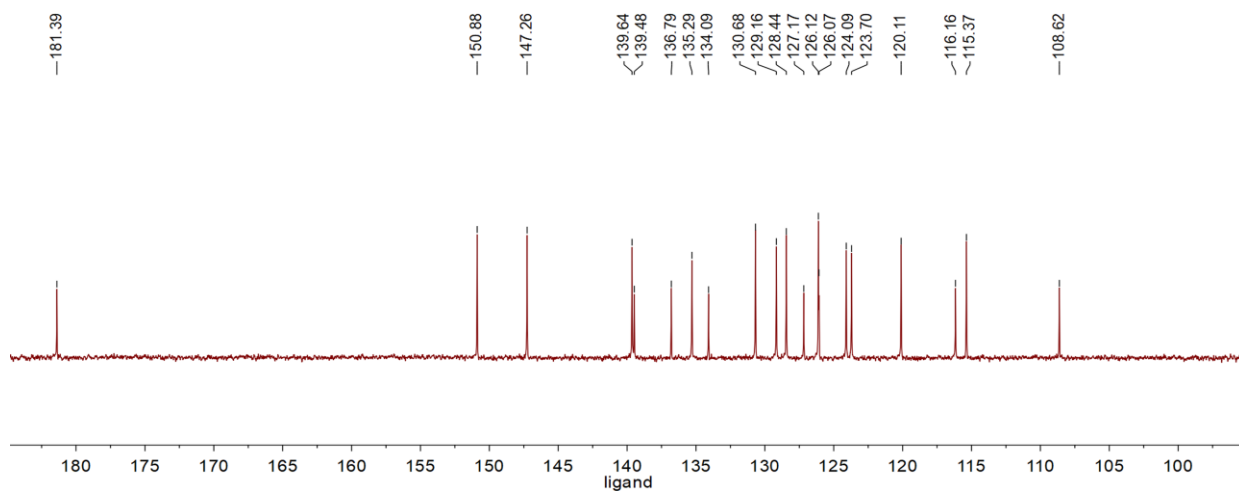

**Figure S2.**  $^{13}\text{C}$  NMR spectrum of ligand Hqnal-5-Br<sub>q</sub> in DMSO-d<sub>6</sub>:  $\delta = 181.39, 150.88, 147.26, 139.64, 139.48, 136.79, 135.29, 134.09, 130.68, 129.16, 128.44, 127.17, 126.12, 126.07, 124.09, 123.70, 120.11, 116.16, 115.37, 108.62$ .

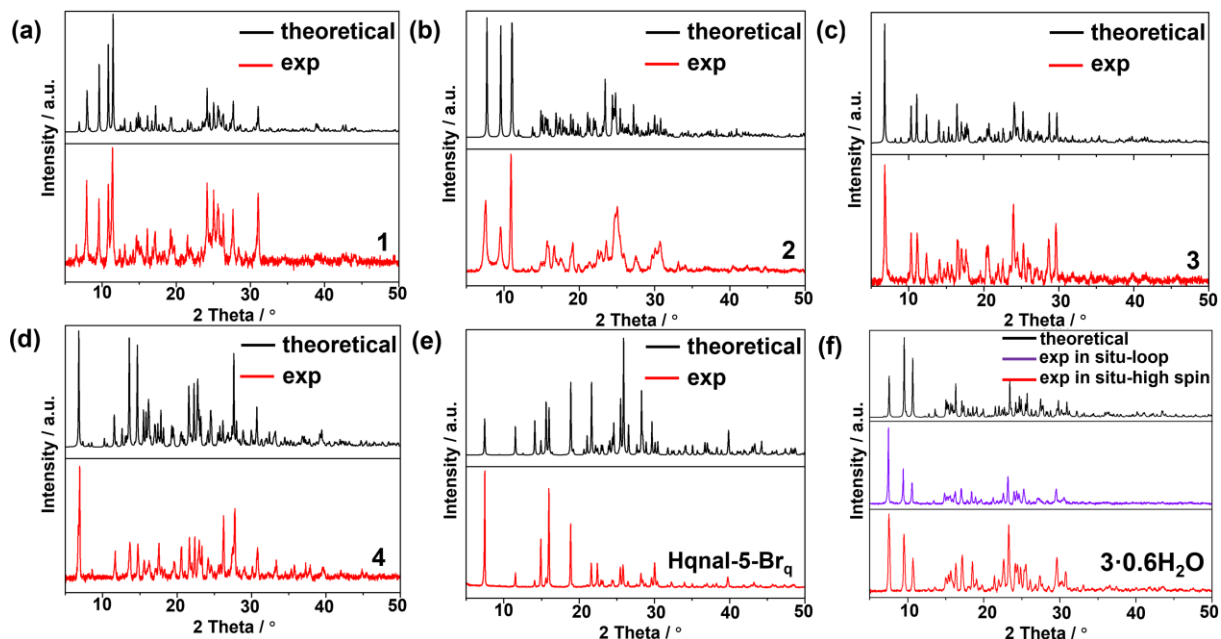

**Figure S3.** Experimental PXRD patterns (red) measured at 300 K and simulated patterns (black) based on single crystal structures for **1-4** (a-d) and Hqnal-5-Br<sub>q</sub> (e); (f) PXRD patterns of the *in-situ* desolvated sample of **3** after the magnetic measurement (purple and red) and the simulated patterns based on the single crystal structure of **3·0.6H<sub>2</sub>O** (black).

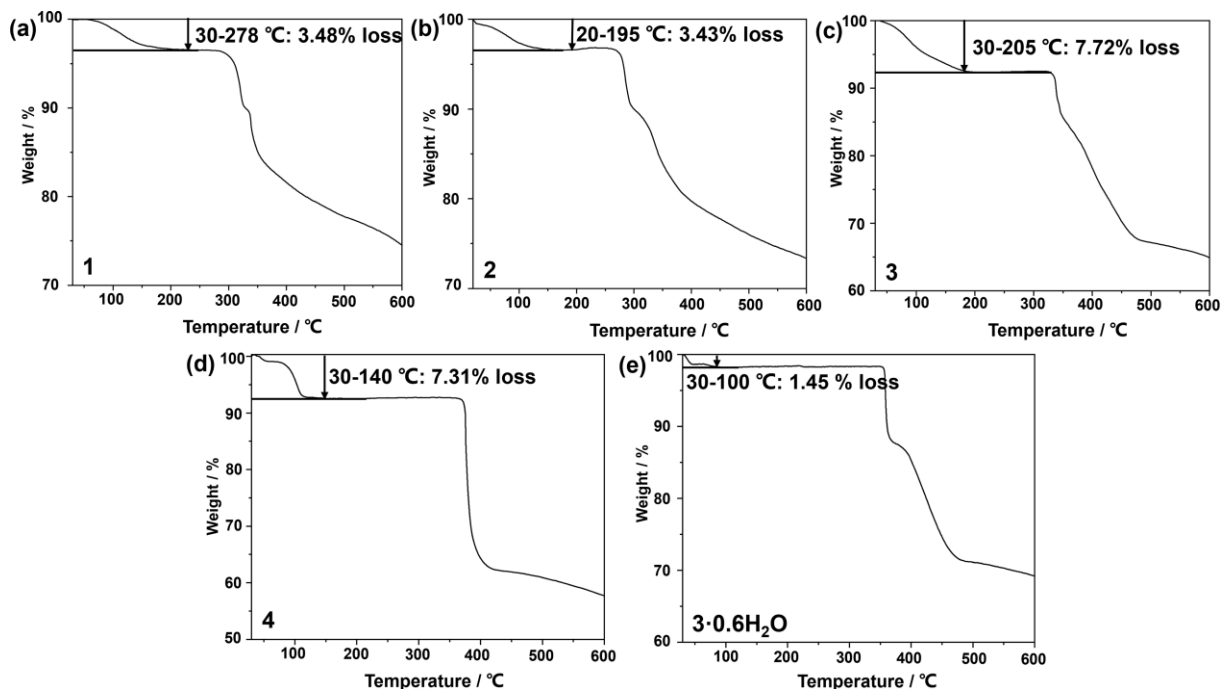

**Figure S4.** TGA curves of **1-4** (a-d) and **3·0.6H<sub>2</sub>O** (e)

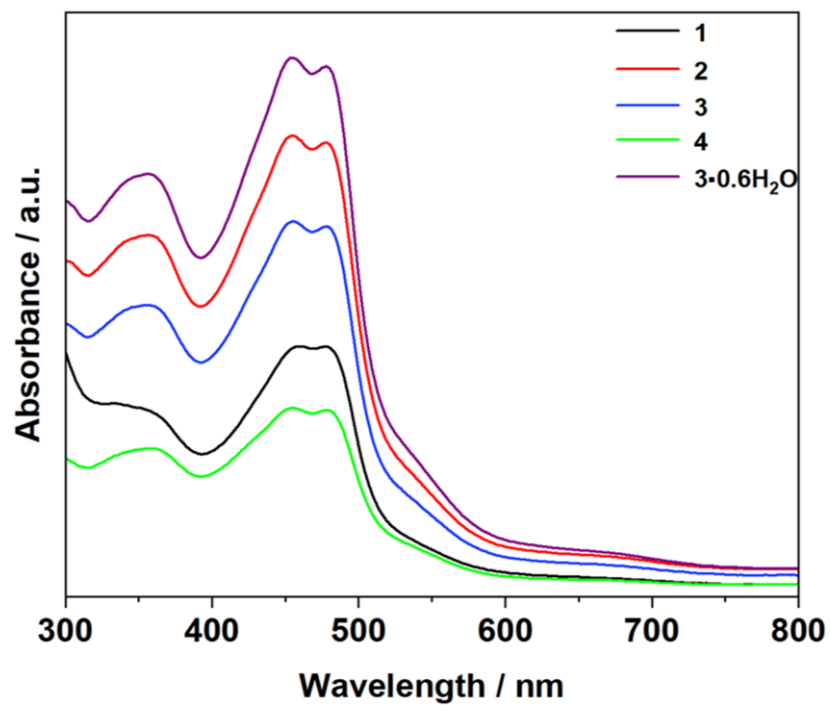

**Figure S5.** UV-visible spectra of **1–4** and **3·0.6H<sub>2</sub>O** in CH<sub>2</sub>Cl<sub>2</sub>.

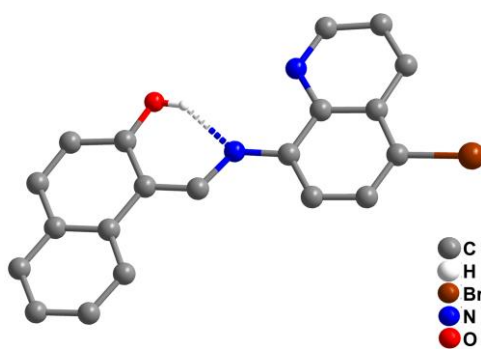

**Figure S6.** Asymmetric unit of Hqnal-5-Br<sub>q</sub> at 193 K.

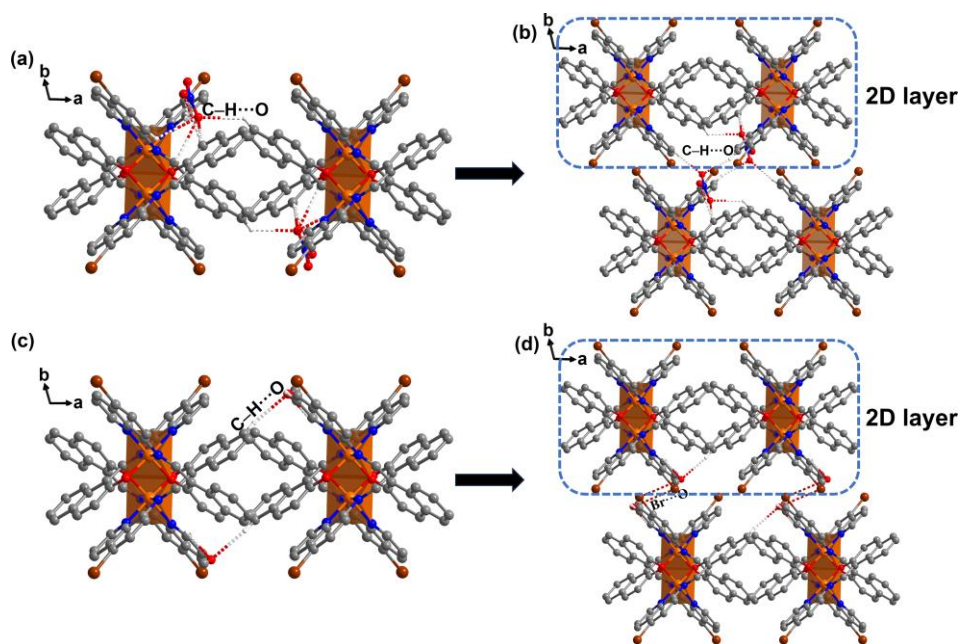

**Figure S7.** The 2D layers and 3D structure of **1**: the C–H···O interactions between the NO<sub>3</sub><sup>-</sup> anions and the cations (a) and (b); the C–H···O and Br···O interactions between the solvents and the cations (c) and (d).

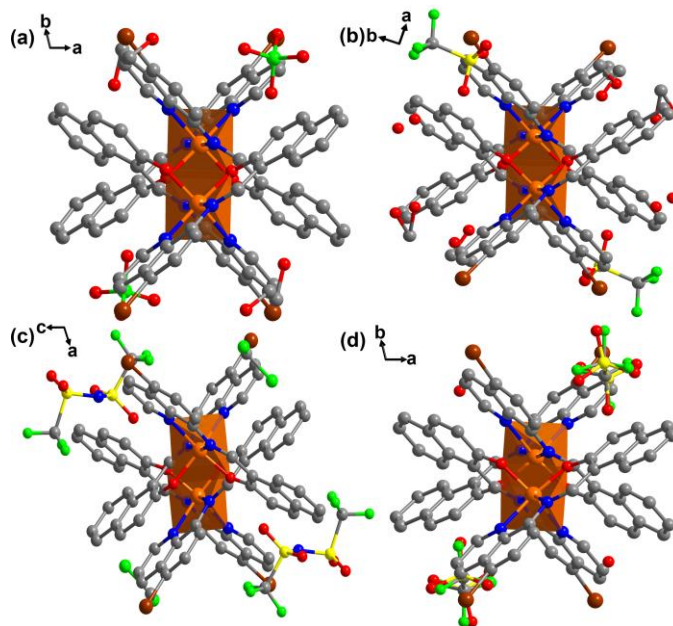

**Figure S8.** The 1D cross-section of complexes **2-4** (a-c) and **3·0.6H<sub>2</sub>O** (d).



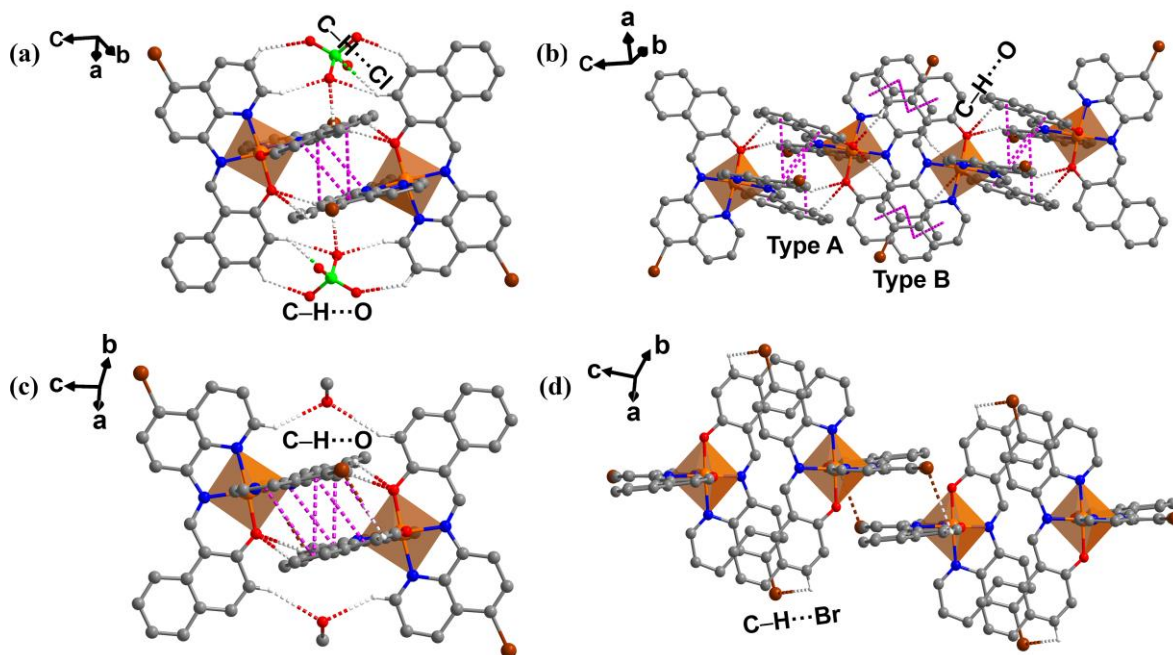

**Figure S9.** The 1D chain of **2**: (a) the C–H $\cdots$ O/Cl interactions between the ClO<sub>4</sub><sup>-</sup> anions and the cations; (b) Type A and Type B  $\pi \cdots \pi$  interactions and the C–H $\cdots$ O interactions between the cations; (c) the C–H $\cdots$ O interactions between the solvent and the cations; (d) the C–H $\cdots$ Br interactions between the cations.

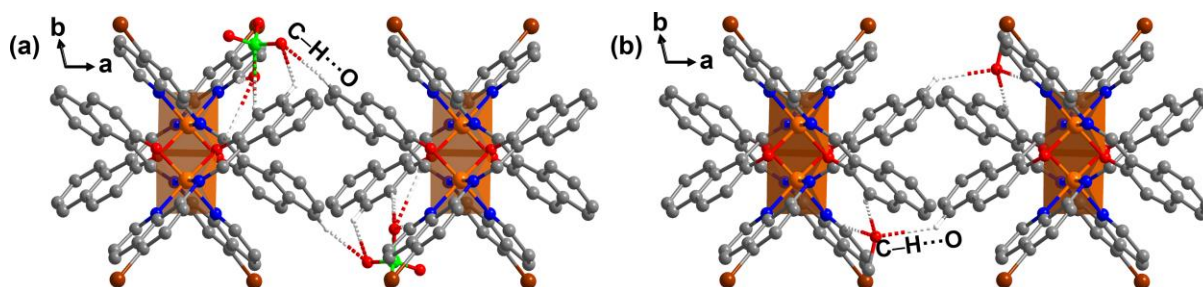

**Figure S10.** The 2D layer of **2**: (a) the C–H $\cdots$ O interactions between the ClO<sub>4</sub><sup>-</sup> anions and the cations; (b) the C–H $\cdots$ O interactions between the solvents and the cations.

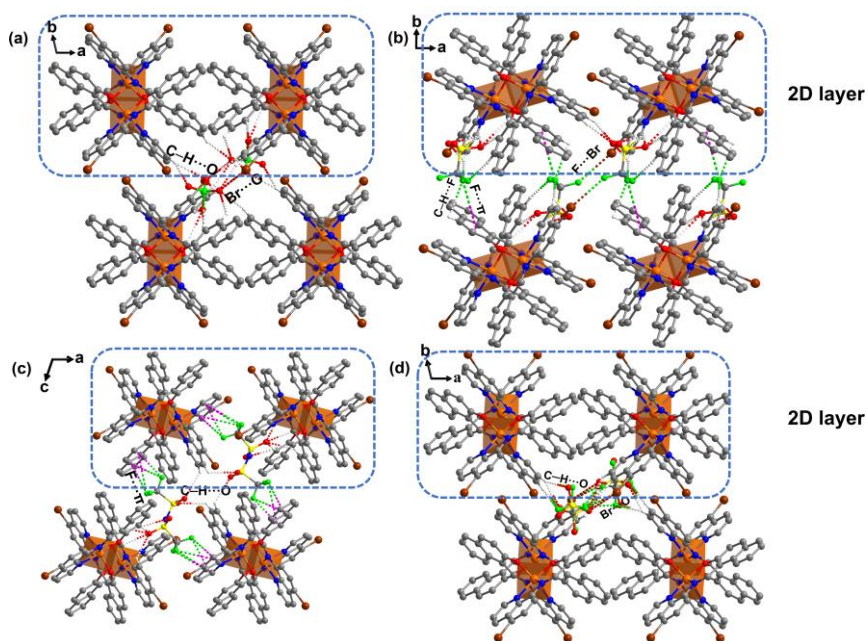

**Figure S11.** 3D structures of **2-4** and **3·0.6H<sub>2</sub>O** (a) The C–H···O and Br···O interactions between the 2D layers of **2**; (b) The C–H···O and F···Br/ $\pi$  interactions between the 2D layers of **3**; (c) The C–H···O and F···Br/ $\pi$  interactions between the 2D layers of **4**; (d) The C–H···O and Br···O interactions between the 2D layers of **3·0.6H<sub>2</sub>O**.

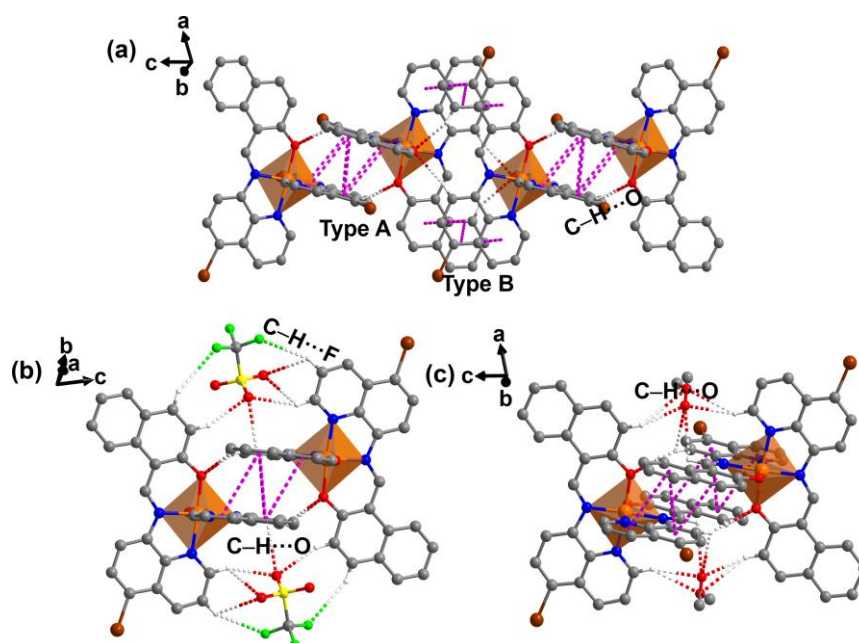

**Figure S12.** The 1D chain of **3**: (a) Type A and Type B  $\pi$ ··· $\pi$  interactions and the C–H···O interactions between the cations; (b) the C–H···O/F interactions between the OTf<sup>−</sup> anions and cations; (c) the C–H···O interactions between the solvents and cations.

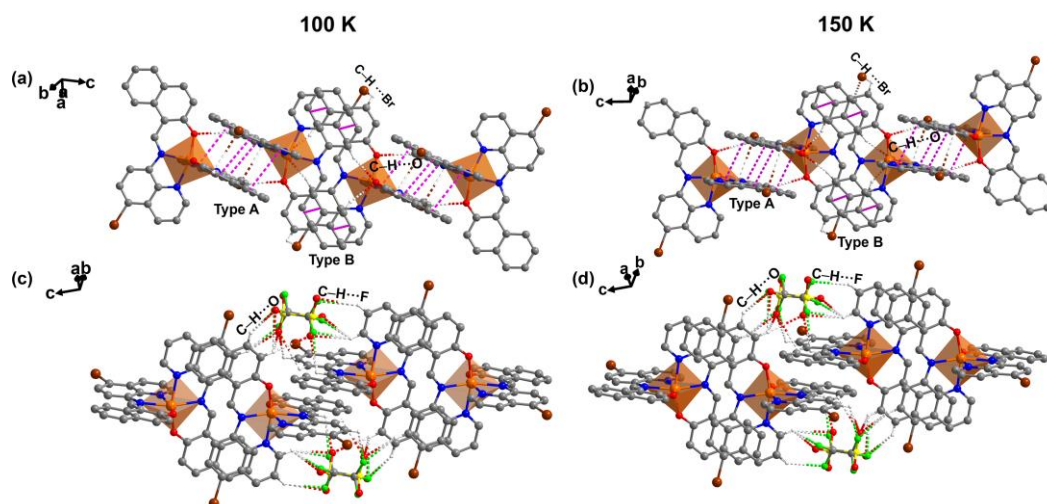

**Figure S13.** The 1D chain of  $3 \cdot 0.6\text{H}_2\text{O}$ : (a-b) Type A and Type B  $\pi \cdots \pi$  interactions, the  $\text{C-H} \cdots \text{O}$  and the  $\text{C-H} \cdots \text{Br}$  interactions between the cations; (c-d) the  $\text{C-H} \cdots \text{O/F}$  interactions between the  $\text{OTf}^-$  anions and the cations.

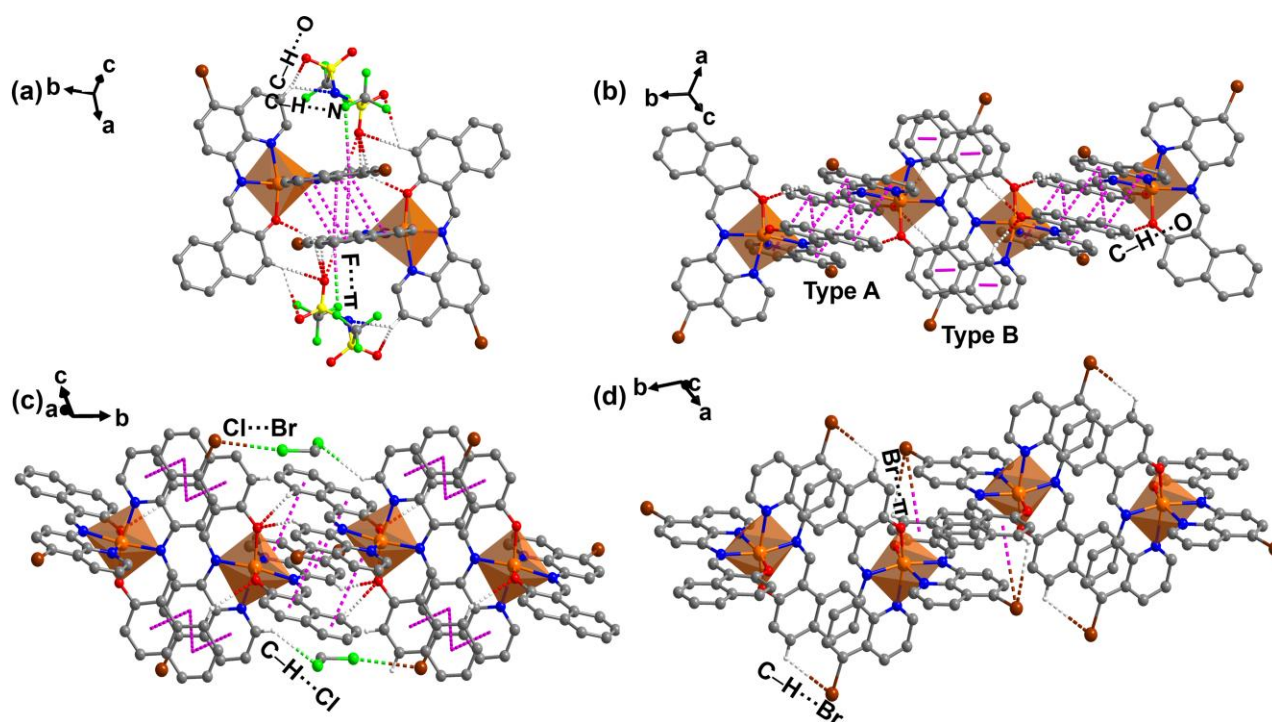

**Figure S14.** The 1D chain of **4**: (a) the  $\text{C-H} \cdots \text{O/N}$  and  $\text{F} \cdots \pi$  interactions between the cations and the  $\text{NTf}_2^-$  anions; (b) Type A and Type B  $\pi \cdots \pi$  interactions and the  $\text{C-H} \cdots \text{O}$  interactions between the cations; (c) the  $\text{C-H} \cdots \text{Cl}$  and  $\text{Cl} \cdots \text{Br}$  interactions between the solvents and the cations; (d) the  $\text{C-H} \cdots \text{Br}$  and  $\text{Br} \cdots \pi$  interactions between the cations.



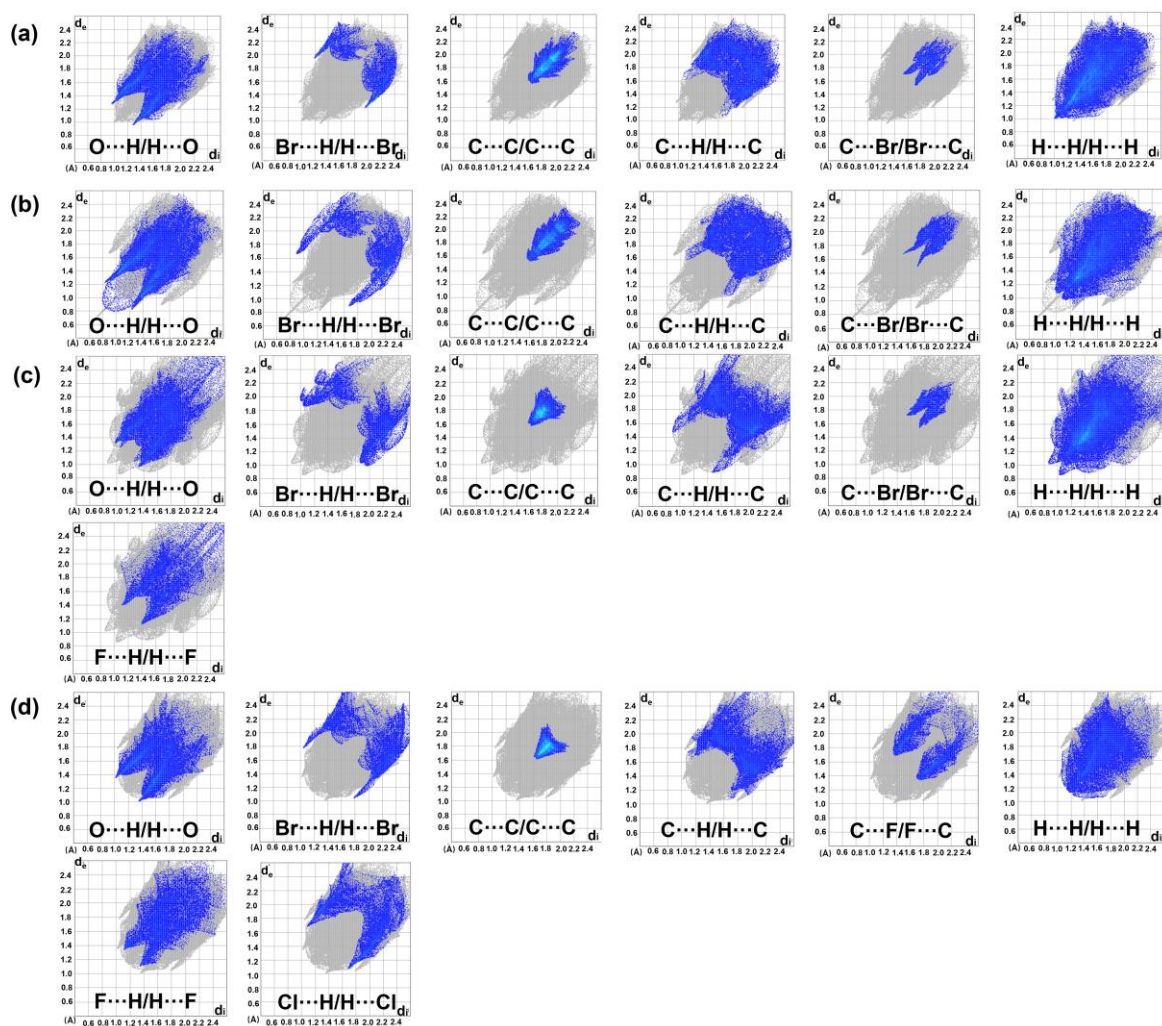

**Figure S15.** Hirshfeld surface 2D fingerprint plots for **1-4** (a-d) at low temperature.

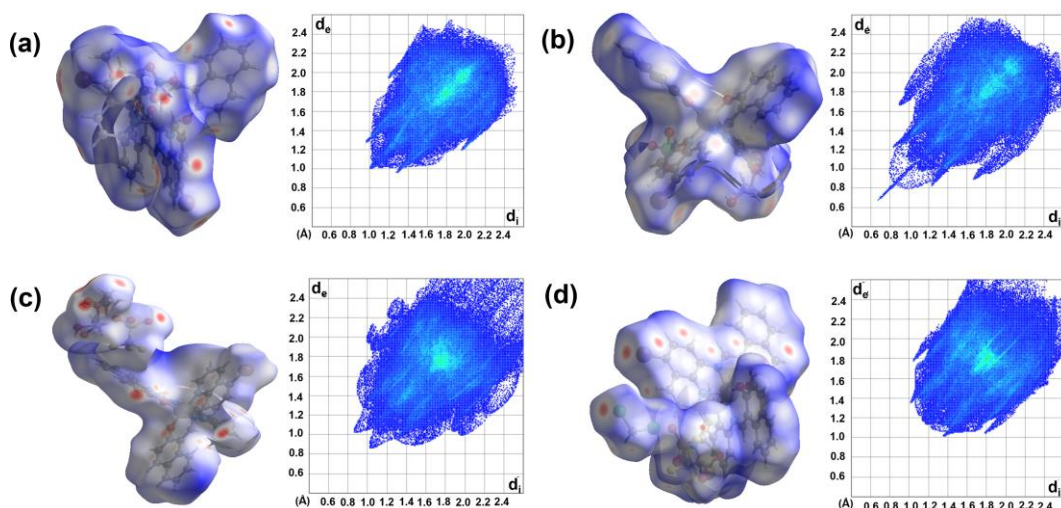

**Figure S16.** Hirshfeld surface mapped with  $d_{\text{hom}}$  and Hirshfeld surface 2D fingerprint plots for all contacts for **1-4** (a-d) at low temperature.

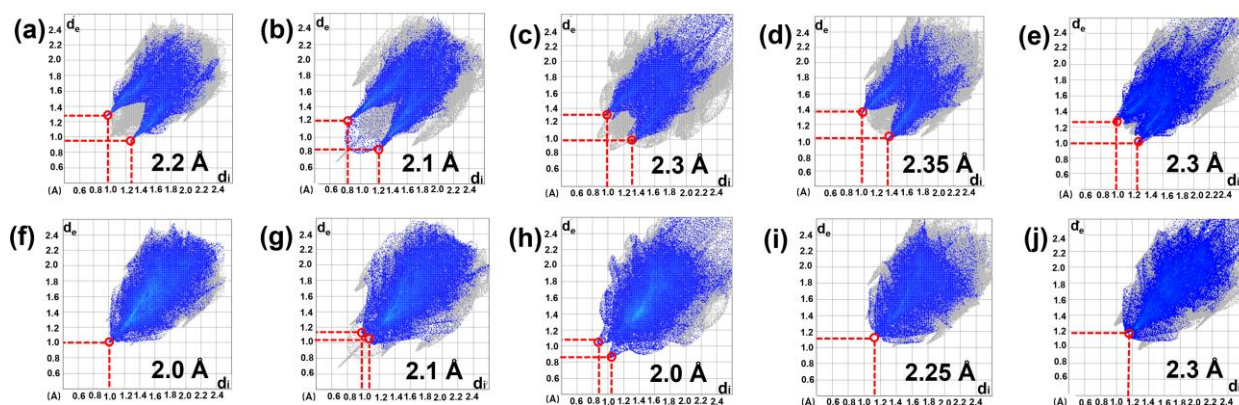

**Figure S17.** Hirshfeld surface 2D fingerprint plots of H $\cdots$ O/O $\cdots$ H corresponding to (a)-(e) and H $\cdots$ H/H $\cdots$ H corresponding to (f)-(j) for **1-4** and **3 $\cdot$ 0.6H<sub>2</sub>O** at low temperature.

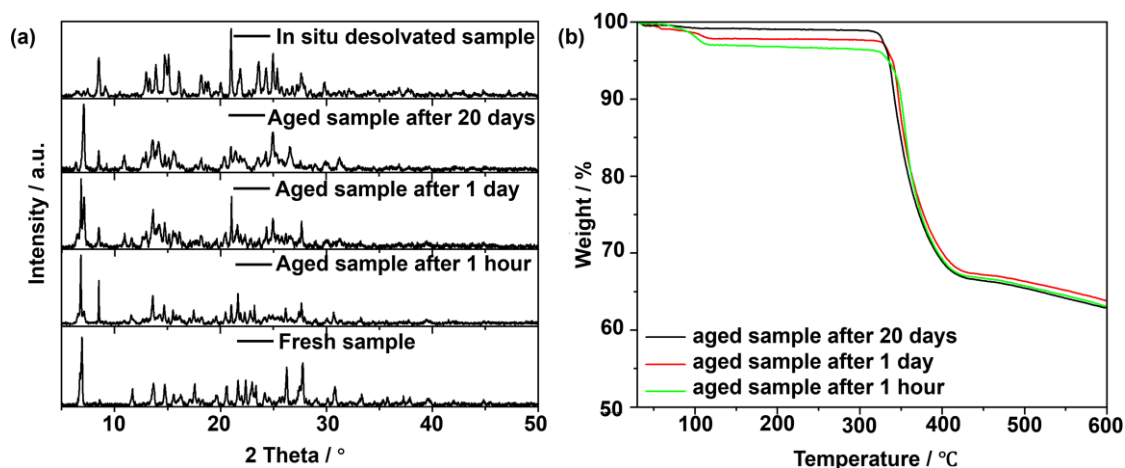

**Figure S18.** PXRD patterns (a) and TGA curves (b) of complex **4** after different aging times.

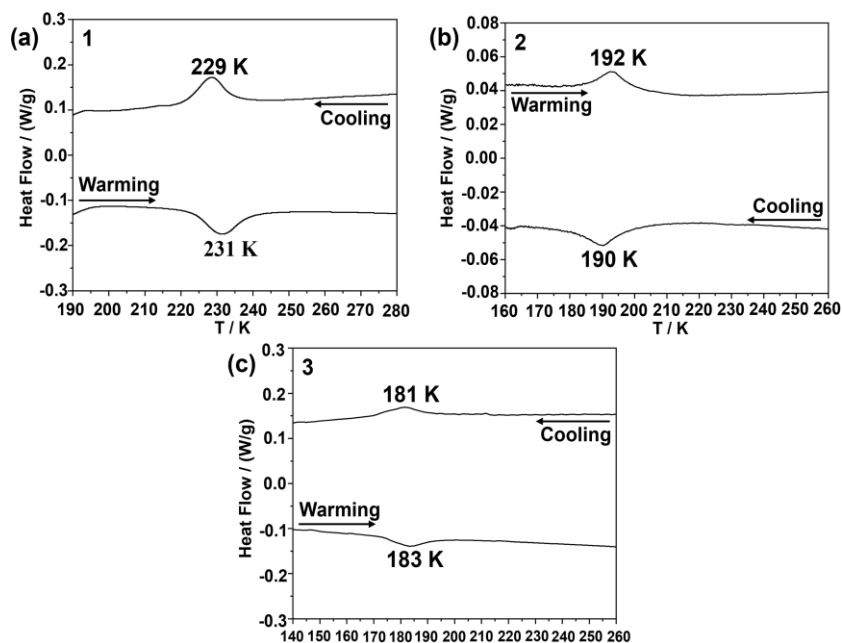

**Figure S19.** DSC curves at a sweep rate of 5 K $\cdot$ min<sup>-1</sup> for **1** (a), **2** (b) and **3** (c).

**Table S1.** Crystallographic data and structure refinement parameters of **1** and **2**.

| Complex                                                                                                                                                                                                                                                                                                                                    | <b>1</b>                                                                        |                    | <b>2</b>                                                                        |
|--------------------------------------------------------------------------------------------------------------------------------------------------------------------------------------------------------------------------------------------------------------------------------------------------------------------------------------------|---------------------------------------------------------------------------------|--------------------|---------------------------------------------------------------------------------|
| Formula                                                                                                                                                                                                                                                                                                                                    | C <sub>41</sub> H <sub>28</sub> Br <sub>2</sub> FeN <sub>5</sub> O <sub>6</sub> |                    | C <sub>41</sub> H <sub>28</sub> Br <sub>2</sub> FeN <sub>4</sub> O <sub>7</sub> |
| Formula weight                                                                                                                                                                                                                                                                                                                             | 902.35                                                                          |                    | 939.79                                                                          |
| <i>T</i> / K                                                                                                                                                                                                                                                                                                                               | 100                                                                             | 300                | 90                                                                              |
| Crystal system                                                                                                                                                                                                                                                                                                                             | Triclinic                                                                       | Triclinic          | Triclinic                                                                       |
| Space group                                                                                                                                                                                                                                                                                                                                | <i>P</i> $\bar{1}$                                                              | <i>P</i> $\bar{1}$ | <i>P</i> $\bar{1}$                                                              |
| <i>a</i> / Å                                                                                                                                                                                                                                                                                                                               | 11.352(3)                                                                       | 11.649(7)          | 11.811(2)                                                                       |
| <i>b</i> / Å                                                                                                                                                                                                                                                                                                                               | 12.600(3)                                                                       | 12.268(8)          | 12.312(2)                                                                       |
| <i>c</i> / Å                                                                                                                                                                                                                                                                                                                               | 13.448(3)                                                                       | 13.964(8)          | 13.297(2)                                                                       |
| $\alpha$ / °                                                                                                                                                                                                                                                                                                                               | 110.230(7)                                                                      | 110.74(3)          | 106.646(8)                                                                      |
| $\beta$ / °                                                                                                                                                                                                                                                                                                                                | 94.715(8)                                                                       | 95.023(17)         | 93.560(8)                                                                       |
| $\gamma$ / °                                                                                                                                                                                                                                                                                                                               | 103.082(8)                                                                      | 103.366(19)        | 101.853(8)                                                                      |
| <i>V</i> / Å <sup>3</sup>                                                                                                                                                                                                                                                                                                                  | 1730.8(7)                                                                       | 1784.0(18)         | 1797.9(5)                                                                       |
| <i>Z</i>                                                                                                                                                                                                                                                                                                                                   | 2                                                                               | 2                  | 2                                                                               |
| $\rho_{\text{calcd}}$ / g·cm <sup>-3</sup>                                                                                                                                                                                                                                                                                                 | 1.731                                                                           | 1.620              | 1.736                                                                           |
| $\mu$ / mm <sup>-1</sup>                                                                                                                                                                                                                                                                                                                   | 4.530                                                                           | 4.366              | 4.833                                                                           |
| <i>F</i> (000)                                                                                                                                                                                                                                                                                                                             | 906.0                                                                           | 870.0              | 942                                                                             |
| <i>R</i> <sub>int</sub>                                                                                                                                                                                                                                                                                                                    | -                                                                               | -                  | -                                                                               |
| GOF on <i>F</i> <sup>2</sup>                                                                                                                                                                                                                                                                                                               | 1.122                                                                           | 1.099              | 1.006                                                                           |
| <i>R</i> <sub>1</sub> / <i>wR</i> <sub>2</sub> ( <i>I</i> ≥ 2σ( <i>I</i> ))                                                                                                                                                                                                                                                                | 0.0676 / 0.1924                                                                 | 0.0868 / 0.2052    | 0.1050 / 0.2356                                                                 |
| <i>R</i> <sub>1</sub> / <i>wR</i> <sub>2</sub> (all data)                                                                                                                                                                                                                                                                                  | 0.0821 / 0.2265                                                                 | 0.1384 / 0.2316    | 0.1543 / 0.2632                                                                 |
| CCDC                                                                                                                                                                                                                                                                                                                                       | 2367591                                                                         | 2367592            | 2367593                                                                         |
| <sup>a</sup> <i>R</i> <sub>1</sub> = Σ   <i>F</i> <sub>o</sub>   -   <i>F</i> <sub>c</sub>    / Σ  <i>F</i> <sub>o</sub>   <sup>b</sup> <i>wR</i> <sub>2</sub> = {Σ[w( <i>F</i> <sub>o</sub> <sup>2</sup> - <i>F</i> <sub>c</sub> <sup>2</sup> ) <sup>2</sup> ] / Σ[w( <i>F</i> <sub>o</sub> <sup>2</sup> ) <sup>2</sup> ]} <sup>1/2</sup> |                                                                                 |                    |                                                                                 |

**Table S2.** Crystallographic data and structure refinement parameters of **3** and **3·0.6H<sub>2</sub>O**.

| Complex                                                                                                                                                                                                                                                                                                                                                      | <b>3</b>                                                                                         |                    | <b>3·0.6H<sub>2</sub>O</b>                                                            |                                                                                       |
|--------------------------------------------------------------------------------------------------------------------------------------------------------------------------------------------------------------------------------------------------------------------------------------------------------------------------------------------------------------|--------------------------------------------------------------------------------------------------|--------------------|---------------------------------------------------------------------------------------|---------------------------------------------------------------------------------------|
| Formula                                                                                                                                                                                                                                                                                                                                                      | C <sub>34</sub> H <sub>34</sub> Br <sub>2</sub> F <sub>3</sub> FeN <sub>4</sub> O <sub>8</sub> S |                    | C <sub>41</sub> H <sub>25.2</sub> Br <sub>2</sub> FeN <sub>4</sub> O <sub>5.6</sub> S | C <sub>41</sub> H <sub>25.2</sub> Br <sub>2</sub> FeN <sub>4</sub> O <sub>5.6</sub> S |
| Formula weight                                                                                                                                                                                                                                                                                                                                               | 1039.47                                                                                          |                    | 968.17                                                                                | 968,17                                                                                |
| <i>T</i> / K                                                                                                                                                                                                                                                                                                                                                 | 100                                                                                              | 300                | 150 K                                                                                 | 100 K                                                                                 |
| Crystal system                                                                                                                                                                                                                                                                                                                                               | Triclinic                                                                                        | Triclinic          | Triclinic                                                                             | Triclinic                                                                             |
| Space group                                                                                                                                                                                                                                                                                                                                                  | <i>P</i> $\bar{1}$                                                                               | <i>P</i> $\bar{1}$ | <i>P</i> $\bar{1}$                                                                    | <i>P</i> $\bar{1}$                                                                    |
| <i>a</i> / Å                                                                                                                                                                                                                                                                                                                                                 | 12.0896(18)                                                                                      | 11.794(8)          | 12.0862(18)                                                                           | 12.0553(8)                                                                            |
| <i>b</i> / Å                                                                                                                                                                                                                                                                                                                                                 | 13.4142(19)                                                                                      | 13.661(8)          | 12.2200(17)                                                                           | 12.1274(8)                                                                            |
| <i>c</i> / Å                                                                                                                                                                                                                                                                                                                                                 | 13.4157(18)                                                                                      | 13.806(7)          | 13.5092(19)                                                                           | 13.4499(9)                                                                            |
| $\alpha$ / °                                                                                                                                                                                                                                                                                                                                                 | 71.329(5)                                                                                        | 72.55(3)           | 107.475(5)                                                                            | 107.357(2)                                                                            |
| $\beta$ / °                                                                                                                                                                                                                                                                                                                                                  | 73.875(5)                                                                                        | 73.62(3)           | 90.727(6)                                                                             | 90.604(2)                                                                             |
| $\gamma$ / °                                                                                                                                                                                                                                                                                                                                                 | 83.853(5)                                                                                        | 85.64(3)           | 102.509(6)                                                                            | 102.644(2)                                                                            |
| <i>V</i> / Å <sup>3</sup>                                                                                                                                                                                                                                                                                                                                    | 1979.7(5)                                                                                        | 2036 (2)           | 1851.5(5)                                                                             | 1825.2(2)                                                                             |
| <i>Z</i>                                                                                                                                                                                                                                                                                                                                                     | 2                                                                                                | 2                  | 2                                                                                     | 2                                                                                     |
| $\rho_{\text{calcd}}$ / g·cm <sup>-3</sup>                                                                                                                                                                                                                                                                                                                   | 1.744                                                                                            | 1.696              | 1.737                                                                                 | 1.762                                                                                 |
| $\mu$ / mm <sup>-1</sup>                                                                                                                                                                                                                                                                                                                                     | 4.441                                                                                            | 4.302              | 4.673                                                                                 | 2.731                                                                                 |
| <i>F</i> (000)                                                                                                                                                                                                                                                                                                                                               | 1046.0                                                                                           | 1046.0             | 966                                                                                   | 966                                                                                   |
| <i>R</i> <sub>int</sub>                                                                                                                                                                                                                                                                                                                                      | 0.0665                                                                                           | 0.0376             | 0.0478                                                                                | 0.0396                                                                                |
| GOF on <i>F</i> <sup>2</sup>                                                                                                                                                                                                                                                                                                                                 | 1.116                                                                                            | 1.094              | 1.085                                                                                 | 1.047                                                                                 |
| <i>R</i> <sub>1</sub> / <i>wR</i> <sub>2</sub> ( <i>I</i> ≥ 2σ( <i>I</i> ))                                                                                                                                                                                                                                                                                  | 0.0630 / 0.1678                                                                                  | 0.0531 / 0.1443    | 0.0430 / 0.1135                                                                       | 0.0375 / 0.0914                                                                       |
| <i>R</i> <sub>1</sub> / <i>wR</i> <sub>2</sub> (all data)                                                                                                                                                                                                                                                                                                    | 0.0919 / 0.1783                                                                                  | 0.0768 / 0.1731    | 0.0522 / 0.1230                                                                       | 0.0435 / 0.0958                                                                       |
| CCDC                                                                                                                                                                                                                                                                                                                                                         | 2367594                                                                                          | 2367595            | 2367596                                                                               | 2384171                                                                               |
| <sup>a</sup> <i>R</i> <sub>1</sub> = Σ   <i>F</i> <sub>o</sub>   -   <i>F</i> <sub>c</sub>    / Σ  <i>F</i> <sub>o</sub>   <sup>b</sup> <i>wR</i> <sub>2</sub> = {Σ[ <i>w</i> ( <i>F</i> <sub>o</sub> <sup>2</sup> - <i>F</i> <sub>c</sub> <sup>2</sup> ) <sup>2</sup> ] / Σ[ <i>w</i> ( <i>F</i> <sub>o</sub> <sup>2</sup> ) <sup>2</sup> ]} <sup>1/2</sup> |                                                                                                  |                    |                                                                                       |                                                                                       |

**Table S3.** Crystallographic data and structure refinement parameters of **4** and Hqnal-5-Br<sub>q</sub>.

| Complex                                                                                                                                                                                                                                                                                                                                 | <b>4</b>                                                                                                                      |                    | Hqnal-5-Br <sub>q</sub>                                                       |
|-----------------------------------------------------------------------------------------------------------------------------------------------------------------------------------------------------------------------------------------------------------------------------------------------------------------------------------------|-------------------------------------------------------------------------------------------------------------------------------|--------------------|-------------------------------------------------------------------------------|
| Formula                                                                                                                                                                                                                                                                                                                                 | C <sub>43</sub> H <sub>26</sub> Br <sub>2</sub> Cl <sub>2</sub> F <sub>6</sub> FeN <sub>5</sub> O <sub>6</sub> S <sub>2</sub> |                    | C <sub>32</sub> H <sub>22</sub> Br <sub>2</sub> N <sub>4</sub> O <sub>2</sub> |
| Formula weight                                                                                                                                                                                                                                                                                                                          | 1173.38                                                                                                                       |                    | 377.23                                                                        |
| <i>T</i> / K                                                                                                                                                                                                                                                                                                                            | 100                                                                                                                           | 300                | 193                                                                           |
| Crystal system                                                                                                                                                                                                                                                                                                                          | Triclinic                                                                                                                     | Triclinic          | Orthorhombic                                                                  |
| Space group                                                                                                                                                                                                                                                                                                                             | <i>P</i> $\bar{1}$                                                                                                            | <i>P</i> $\bar{1}$ | <i>Pbca</i>                                                                   |
| <i>a</i> / Å                                                                                                                                                                                                                                                                                                                            | 13.346(3)                                                                                                                     | 13.2508(12)        | 15.340(2)                                                                     |
| <i>b</i> / Å                                                                                                                                                                                                                                                                                                                            | 13.720(3)                                                                                                                     | 13.8357(13)        | 8.4310(13)                                                                    |
| <i>c</i> / Å                                                                                                                                                                                                                                                                                                                            | 13.909(3)                                                                                                                     | 14.0684(14)        | 23.738(4)                                                                     |
| <i>α</i> / °                                                                                                                                                                                                                                                                                                                            | 104.951(6)                                                                                                                    | 104.455(3)         | 90                                                                            |
| <i>β</i> / °                                                                                                                                                                                                                                                                                                                            | 101.543(7)                                                                                                                    | 99.916(4)          | 90                                                                            |
| <i>γ</i> / °                                                                                                                                                                                                                                                                                                                            | 112.366(6)                                                                                                                    | 111.885(3)         | 90                                                                            |
| <i>V</i> / Å <sup>3</sup>                                                                                                                                                                                                                                                                                                               | 2145.0(8)                                                                                                                     | 2214.3(4)          | 3070.2(8)                                                                     |
| <i>Z</i>                                                                                                                                                                                                                                                                                                                                | 2                                                                                                                             | 2                  | 8                                                                             |
| $\rho_{\text{calcd}}$ / g·cm <sup>-3</sup>                                                                                                                                                                                                                                                                                              | 1.817                                                                                                                         | 1.760              | 1.632                                                                         |
| $\mu$ / mm <sup>-1</sup>                                                                                                                                                                                                                                                                                                                | 5.234                                                                                                                         | 5.070              | 2.450                                                                         |
| <i>F</i> (000)                                                                                                                                                                                                                                                                                                                          | 1166.0                                                                                                                        | 1166.0             | 1520.0                                                                        |
| <i>R</i> <sub>int</sub>                                                                                                                                                                                                                                                                                                                 | 0.0492                                                                                                                        | 0.0635             | 0.0700                                                                        |
| GOF on <i>F</i> <sup>2</sup>                                                                                                                                                                                                                                                                                                            | 1.101                                                                                                                         | 1.024              | 1.073                                                                         |
| <i>R</i> <sub>1</sub> / <i>wR</i> <sub>2</sub> ( <i>I</i> ≥ 2σ( <i>I</i> ))                                                                                                                                                                                                                                                             | 0.0354 / 0.1043                                                                                                               | 0.0528 / 0.1263    | 0.0429 / 0.1314                                                               |
| <i>R</i> <sub>1</sub> / <i>wR</i> <sub>2</sub> (all data)                                                                                                                                                                                                                                                                               | 0.0394 / 0.1096                                                                                                               | 0.0993 / 0.1502    | 0.0641 / 0.1568                                                               |
| CCDC                                                                                                                                                                                                                                                                                                                                    | 2367597                                                                                                                       | 2367598            | 2367599                                                                       |
| <sup>a</sup> <i>R</i> <sub>1</sub> = Σ   <i>F</i> <sub>o</sub>   -   <i>F</i> <sub>c</sub>   Σ  <i>F</i> <sub>o</sub>   <sup>b</sup> <i>wR</i> <sub>2</sub> = {Σ[w( <i>F</i> <sub>o</sub> <sup>2</sup> - <i>F</i> <sub>c</sub> <sup>2</sup> ) <sup>2</sup> ] / Σ[w( <i>F</i> <sub>o</sub> <sup>2</sup> ) <sup>2</sup> ]} <sup>1/2</sup> |                                                                                                                               |                    |                                                                               |



**Table S4.** Selected bond lengths (Å), the averaged Fe–O and Fe–N bonds (Å), and octahedral distortion parameters  $\Theta$ ,  $\Sigma$ , and CShM in **1**, **2**, and **3·0.6H<sub>2</sub>O**.

| Complex             | <b>1</b>  |            | <b>2</b>  | <b>3·0.6H<sub>2</sub>O</b> |           |
|---------------------|-----------|------------|-----------|----------------------------|-----------|
| <i>T</i> / K        | 100       | 300        | 90        | 150 K                      | 100 K     |
| Fe1–O1              | 1.873(3)  | 1.917(6)   | 1.893(11) | 1.926(2)                   | 1.926(2)  |
| Fe1–O2              | 1.883(3)  | 1.923(6)   | 1.867(11) | 1.916(2)                   | 1.917(2)  |
| Fe1–O <sub>av</sub> | 1.878(4)  | 1.920(8)   | 1.880(16) | 1.921(3)                   | 1.922(3)  |
| Fe1–N1              | 1.936(5)  | 2.147(7)   | 1.954(10) | 2.139(3)                   | 2.136(3)  |
| Fe1–N2              | 1.976(7)  | 2.068(7)   | 1.936(11) | 2.113(3)                   | 2.108(3)  |
| Fe1–N3              | 1.976(5)  | 2.145(7)   | 1.974(14) | 2.149(3)                   | 2.148(3)  |
| Fe1–N4              | 1.929(5)  | 2.094(7)   | 1.954(11) | 2.104(3)                   | 2.106(2)  |
| Fe1–N <sub>av</sub> | 1.954(11) | 2.114(14)  | 1.954(23) | 2.126(6)                   | 2.124(5)  |
| <i>V</i>            | 1730.8(7) | 1784.0(18) | 2092.4(4) | 1851.5(5)                  | 1825.2(2) |
| $\Sigma$            | 32        | 69         | 31        | 74.5                       | 73.4      |
| $\Theta$            | 92        | 249        | 97        | 281.6                      | 280.2     |
| CShM                | 0.180     | 1.314      | 0.203     | 1.626                      | 1.606     |

$\Sigma$  is the sum of the deviations of the bite angles from 90°.

$\Theta$  is the sum of the deviation from 60° of the 24 trigonal angles of the projection of the octahedron onto its trigonal faces.

**Table S5.** Selected bond lengths (Å), the averaged Fe–O and Fe–N bonds (Å), and octahedral distortion parameters  $\Theta$ ,  $\Sigma$ , and CShM in **3** and **4**.

| Complex             | <b>3</b>  |           | <b>4</b>   |           |
|---------------------|-----------|-----------|------------|-----------|
| <i>T</i> / K        | 100       | 300       | 100        | 300       |
| Fe1–O1              | 1.875(4)  | 1.900(3)  | 1.9210(19) | 1.915(3)  |
| Fe1–O2              | 1.876(3)  | 1.912(3)  | 1.9248(19) | 1.910(3)  |
| Fe1–O <sub>av</sub> | 1.876(5)  | 1.906(4)  | 1.9229(27) | 1.913 (4) |
| Fe1–N1              | 1.975(5)  | 2.136(4)  | 2.103(2)   | 2.099(4)  |
| Fe1–N2              | 1.936(4)  | 2.090(4)  | 2.138(2)   | 2.141(4)  |
| Fe1–N3              | 1.979(4)  | 2.132(4)  | 2.109(2)   | 2.113(4)  |
| Fe1–N4              | 1.949(4)  | 2.105(4)  | 2.147(2)   | 2.142(4)  |
| Fe1–N <sub>av</sub> | 1.960(9)  | 2.116(8)  | 2.124(4)   | 2.136(8)  |
| <i>V</i>            | 1979.7(5) | 2036.0(2) | 2145.0(8)  | 2214.3(4) |
| $\Sigma$            | 35.3      | 69.6      | 68.1       | 70.5      |
| $\Theta$            | 109.3     | 263.0     | 265.3      | 273.4     |
| CShM                | 0.256     | 1.472     | 1.477      | 1.565     |

$\Sigma$  is the sum of the deviations of the bite angles from 90°.

$\Theta$  is the sum of the deviation from 60° of the 24 trigonal angles of the projection of the octahedron onto its trigonal faces.

**Table S6.** Intermolecular interaction distances at different temperatures of **1**

| Crystal                               | <b>1</b>          |                           |
|---------------------------------------|-------------------|---------------------------|
|                                       | T / K             |                           |
|                                       | 100 K             | 300 K                     |
| <b>1D chain</b>                       |                   |                           |
| $\pi \cdots \pi$ (Type A1, A2 and A3) | 3.691/3.785/-     | 3.697/3.966/3.913         |
| $\pi \cdots \pi$ (Type B1, B2 and B3) | 3.876/3.682/3.638 | 3.817/3.783/3.637         |
| C8–H8/C13–H13 $\cdots$ O1             | 2.786/2.777       | 2.854/2.879               |
| C27–H27/C33–H33 $\cdots$ O2           | 2.636/2.682       | 2.764/-                   |
| C3–H3 $\cdots$ Br2                    | 3.469             | 3.581                     |
| C23–H23 $\cdots$ Br1                  | 3.542             | 3.567                     |
| Fe–Fe (Type A and B)                  | 7.182/7.102       | 7.228/7.283               |
| <b>NO<sub>3</sub> interactions</b>    |                   |                           |
| C22–H22 $\cdots$ O5                   | 2.882             | 2.813                     |
| C40–H40 $\cdots$ O3                   | 2.785             | -                         |
| C40–H40 $\cdots$ O4(O5A)              | 2.455             | 2.685(2.545)              |
| C22–H22 $\cdots$ O4(O3A)              | 2.505             | 2.876(2.472)              |
| C7–H7/C13–H13 $\cdots$ O4             | 2.712/2.823       | 2.452/2.782               |
| <b>2D plane</b>                       |                   |                           |
| $\pi \cdots \pi$ (Type C1 and C2)     | 3.875/3.868       | 3.783/3.795               |
| <b>NO<sub>3</sub> interactions</b>    |                   |                           |
| C11–H11 $\cdots$ O4(O3A)              | 2.622             | 2.630(2.610)              |
| <b>Solvent interactions</b>           |                   |                           |
| C18–H18/ C19–H19/C30–H30 $\cdots$ O6  | 2.694/2.717/2.561 | -/2.716/2.575             |
| <b>3D structure</b>                   |                   |                           |
| Br2 $\cdots$ $\pi$ 1/ $\pi$ 2         | 3.697/3.329       | 3.602/3.294               |
| C3–H3/C23–H23 $\cdots$ Br1            | 3.590/3.330       | 3.524/3.357               |
| <b>NO<sub>3</sub> interactions</b>    |                   |                           |
| C18–H18/C38–H38 $\cdots$ O3(O5A)      | 2.372/2.475       | 2.284(2.524)/2.504(2.706) |
| <b>Solvent interactions</b>           |                   |                           |
| Br2 $\cdots$ O6                       | 3.565             | -                         |

**Table S7.** Intermolecular interaction distances at 90 K of **2**

| Complex                               | <b>2</b>          |
|---------------------------------------|-------------------|
| <i>T</i> / K                          | 90 K              |
| <b>1D chain</b>                       |                   |
| $\pi \cdots \pi$ (Type A1 and A2)     | 3.888/3.677       |
| $\pi \cdots \pi$ (Type B1, B2 and B3) | 3.848/3.785/3.622 |
| C7–H7/C13–H13 $\cdots$ O2             | 2.564/2.853       |
| C27–H27/C33–H33 $\cdots$ O1           | 2.544/2.697       |
| C18–H18 $\cdots$ Br1                  | 3.532             |
| C38–H38 $\cdots$ Br2                  | 3.480             |
| Fe–Fe (Type A and B)                  | 7.046/7.022       |
| <b>ClO<sub>4</sub> interactions</b>   |                   |
| C38–H38 $\cdots$ O6                   | 2.575             |
| C39–H39 $\cdots$ O3/C11               | 2.483/3.090       |
| C10–H10/C21–H21 $\cdots$ O3           | 2.668/2.393       |
| C22–H22 $\cdots$ O4                   | 2.895             |
| <b>Solvent interactions</b>           |                   |
| C1–H1/C19–H19 $\cdots$ O7             | 2.526/2.758       |
| <b>2D plane</b>                       |                   |
| <b>ClO<sub>4</sub> interactions</b>   |                   |
| C16–H16 $\cdots$ O6                   | 2.524             |
| <b>Solvent interactions</b>           |                   |
| C36–H36 $\cdots$ O7                   | 2.658             |
| <b>3D structure</b>                   |                   |
| Br1 $\cdots$ $\pi$ 1/ $\pi$ 2         | 3.591/3.387       |
| C36–H36 $\cdots$ Br2                  | 3.489             |
| <b>ClO<sub>4</sub> interactions</b>   |                   |
| C16–H16/C23–H23/ C38–H38 $\cdots$ O6  | 2.524/2.309/2.575 |
| C22–H22 $\cdots$ O4                   | 2.812             |
| C2–H2 $\cdots$ O4/O5                  | 2.673/2.487       |
| Br2 $\cdots$ O6                       | 3.408             |

**Table S8.** Intermolecular interaction distances at different temperatures of **3**

| Crystal                               | <b>3</b>                  |                   |
|---------------------------------------|---------------------------|-------------------|
| <i>T</i> / K                          | 100 K                     | 300 K             |
| <b>1D chain</b>                       |                           |                   |
| $\pi \cdots \pi$ (Type A1, A2 and A3) | 3.634/3.599/3.748         | 3.707/-/3.641     |
| $\pi \cdots \pi$ (Type B1, B2 and B3) | 3.670/3.794/3.805         | 3.745/3.707/3.605 |
| C27–H27/ C33–H33 $\cdots$ O1          | 2.811/2.641               | -/2.786           |
| C7–H7/C13–H13 $\cdots$ O2             | 2.556/2.753               | 2.564/2.887       |
| C36–H36/C38–H38 $\cdots$ Br2          | 3.542/3.557               | 3.504/3.581       |
| C18–H18 $\cdots$ Br1                  | 3.483                     | 3.504             |
| Fe–Fe (Type A and B)                  | 7.183/7.026               | 7.370/6.970       |
| <b>OTf interactions</b>               |                           |                   |
| C22–H22 $\cdots$ O4/F1                | 2.859/2.712               | -/2.699           |
| C21–H21 $\cdots$ O4/O3                | 2.697/2.459               | 2.735/2.733       |
| C10–H10/C39–H39 $\cdots$ O3           | 2.842/2.463               | 2.681/2.682       |
| C38–H38 $\cdots$ F2                   | 2.879                     | 2.749             |
| <b>Solvent interactions</b>           |                           |                   |
| C1–H1/C19–H19 $\cdots$ O8(O8A)        | 2.557(2.700)/2.396(2.857) | -(2.496)/-(2.578) |
| C27–H27/C30–H30 $\cdots$ O8           | 2.624/2.626               | 2.608/-           |
| <b>2D plane</b>                       |                           |                   |
| C18–H18 $\cdots$ Br2                  | 3.370                     | 3.481             |
| Br1 $\cdots$ $\pi$ 1/ $\pi$ 2         | 3.473/3.479               | 3.441/3.532       |
| C3–H3 $\cdots$ $\pi$                  | 3.461                     | 3.444             |
| <b>OTf interactions</b>               |                           |                   |
| C2–H2/C3–H3 $\cdots$ O4               | 2.509/2.565               | 2.503/2.811       |
| <b>Solvent interactions</b>           |                           |                   |
| C42–H42C/H42B/ C42A–H42E $\cdots$ Br2 | 3.126/3.304/3.479         | 3.159/-/-         |
| <b>3D structure</b>                   |                           |                   |
| C23–H23 $\cdots$ C15                  | 3.142                     | 3.243             |
| C35–H35 $\cdots$ C14/C13/ $\pi$       | 2.892/3.109/3.519         | 2.971/3.255/3.540 |
| <b>OTf interactions</b>               |                           |                   |
| C18–H18 $\cdots$ F1(F1A)              | 2.868                     | 2.821(2.830)      |
| F1 $\cdots$ $\pi$                     | 3.900                     | -                 |
| Br2 $\cdots$ F3(F3A)                  | 3.217                     | 3.207(3.204)      |

**Table S9.** Intermolecular interaction distances at 100 K and 150 K of **3·0.6H<sub>2</sub>O**

| Complex                           | <b>3·0.6H<sub>2</sub>O</b> |                         |
|-----------------------------------|----------------------------|-------------------------|
|                                   | T / K                      |                         |
| <b>1D chain</b>                   |                            |                         |
| $\pi \cdots \pi$ (Type A1 and A2) | 3.628/3.884                | 3.600/3.837             |
| $\pi \cdots \pi$ (Type B1 and B2) | 3.587/3.656                | 3.573/3.632             |
| C7–H7 $\cdots$ O2                 | 2.694                      | 2.666                   |
| C27–H27/C33–H33 $\cdots$ O1       | 2.578/2.711                | 2.544/2.665             |
| C18–H18 $\cdots$ Br2              | 3.540                      | 3.498                   |
| C38–H38 $\cdots$ Br1              | -                          | 3.703                   |
| Fe–Fe (Type A and B)              | 7.103/6.799                | 7.069/6.756             |
| <b>OTf interactions</b>           |                            |                         |
| C22–H22 $\cdots$ F1               | 2.726                      | 2.738                   |
| C21–H21 $\cdots$ O3A/O5A/F2/F3    | 2.765/2.767/2.521/2.843    | 2.699/2.890/2.531/2.775 |
| C26–H26 $\cdots$ O5/F3A           | 2.627/2.858                | 2.600/2.744             |
| C39–H39 $\cdots$ O3A/O4/O5/F1A    | 2.701/2.821/2.641/2.889    | 2.713/2.772/2.632/2.816 |
| C38–H38/ $\cdots$ O4/F1A          | 2.704/2.817                | 2.652/2.824             |
| C6–H6 $\cdots$ O5/F3A             | 2.606/2.698                | 2.578/2.663             |
| C10–H10 $\cdots$ O3A/F2           | 2.509/2.692                | 2.471/2.690             |
| C7–H7 $\cdots$ O5                 | 2.892                      | 2.871                   |
| <b>2D plane</b>                   |                            |                         |
| $\pi \cdots \pi$ (Type C)         | 3.685                      | 3.647                   |
| <b>OTf interactions</b>           |                            |                         |
| C16–H16 $\cdots$ O4/O4A/F2        | 2.635/2.637/2.891          | 2.601/2.676./2.880      |
| C15–H15 $\cdots$ O4A/F2           | 2.887/2.843                | 2.853/2.835             |
| <b>Solvent interactions</b>       |                            |                         |
| C1–H1/C36–H36 $\cdots$ O6         | 2.574/2.865                | 2.533/2.838             |
| <b>3D structure</b>               |                            |                         |
| Br2 $\cdots$ $\pi$                | 3.525                      | 3.487                   |
| Br1 $\cdots$ Br1                  | 3.761                      | 3.691                   |
| <b>OTf interactions</b>           |                            |                         |
| Br1 $\cdots$ F1A/O4               | 3.470/3.468                | 3.513/3.412             |
| C23–H23 $\cdots$ F1A/F2A          | 2.450/2.718                | 2.440/2.723             |
| C22–H22 $\cdots$ O4A/F1           | 2.534/2.682                | 2.495/2.685             |
| C2–H2 $\cdots$ O3/O5A/F2A/F3      | 2.502/2.504/2.658/2.500    | 2.480/2.385/2.623/2.540 |
| C3–H3 $\cdots$ O5A/F3             | 2.426/2.602                | 2.410/2.564             |

**Table S10.** Intermolecular interaction distances at different temperatures of **4**

| Crystal                               | <b>4</b>          |                   |
|---------------------------------------|-------------------|-------------------|
| <i>T</i> / K                          | 100 K             | 300 K             |
| <b>1D chain</b>                       |                   |                   |
| $\pi \cdots \pi$ (Type A1, A2 and A3) | 3.642/3.660/3.670 | 3.666/3.758/3.748 |
| $\pi \cdots \pi$ (Type B1 and B2)     | 3.600/3.563       | 3.624/3.719       |
| C10–H10 $\cdots$ O1                   | 2.777             | 2.886             |
| C33–H33/ C28–H28 $\cdots$ O2          | 2.494/2.687       | 2.596/2.808       |
| C3–H3 $\cdots$ Br2                    | 3.516             | 3.491             |
| C23–H23 $\cdots$ Br1                  | 3.406             | 3.502             |
| Br1 $\cdots\pi$                       | 3.899             | 3.981             |
| Fe–Fe (Type A and B)                  | 7.474/6.808       | 7.448/6.929       |
| <b>NTf<sub>2</sub> interactions</b>   |                   |                   |
| C22–H22 $\cdots$ O4/O3                | 2.897/2.582       | 2.889/2.745       |
| C10–H10/C11–H11/ C13–H13 $\cdots$ O3  | 2.682/2.452/2.578 | 2.771/2.476/2.659 |
| C39–H39 $\cdots$ O6/N5                | 2.611/2.673       | 2.786/2.722       |
| F2 $\cdots\pi$                        | 3.700             | 3.777             |
| <b>Solvent interactions</b>           |                   |                   |
| C2–H2/C18–H18 $\cdots$ Cl1            | -/2.886           | 3.070/2.888       |
| Br2 $\cdots$ Cl2                      | 3.602             | 3.637             |
| <b>2D plane</b>                       |                   |                   |
| C14–H14/ C34–H34/Br1 $\cdots$ Br1     | 3.496/3.506/3.772 | 3.517/3.522/3.831 |
| C40–H40 $\cdots$ Br2                  | 2.968             | 2.920             |
| <b>NTf<sub>2</sub> interactions</b>   |                   |                   |
| C19–H19 $\cdots$ O5                   | 2.819             | -                 |
| C20–H20 $\cdots$ O6                   | 2.614             | 2.626             |
| C38–H38 $\cdots$ F4                   | 2.887             | -                 |
| F4/F5/F6 $\cdots\pi$ 1                | 3.656/3.682/3.336 | 3.592/3.729/3.712 |
| F5/F6 $\cdots\pi$ 2                   | 3.630/3.508       | 3.563/3.689       |
| <b>Solvent interactions</b>           |                   |                   |
| Br1 $\cdots$ Cl2                      | 3.397             | 3.645             |
| <b>3D structure</b>                   |                   |                   |
| C3–H3 $\cdots$ Br2                    | 3.611             | -                 |
| C31–H31 $\cdots$ C7                   | 2.974             | -                 |
| <b>NTf<sub>2</sub> interactions</b>   |                   |                   |
| C19–H19 $\cdots$ O5                   | 2.757             | 2.741             |
| <b>Solvent interactions</b>           |                   |                   |
| C7–H7 $\cdots$ Cl2                    | 3.031             | 3.098             |

**Table S11.** Intermolecular interactions contributions for **1-4** calculated by Hirshfeld surface at different temperatures.

| Complex                          | H...H | H...O | H...Br | H...F | H...C | H...N | C...C | C...Br | C...F | O...Br | Other |
|----------------------------------|-------|-------|--------|-------|-------|-------|-------|--------|-------|--------|-------|
| <b>1(100 K)</b>                  | 35.8  | 17.7  | 7.1    | -     | 18.2  | 2.0   | 12.9  | 4.0    | -     | 1.3    | 1.0   |
| <b>1(300 K)</b>                  | 31.1  | 23.8  | 7.2    | -     | 14.5  | 2.5   | 12.5  | 4.2    | -     | 1.7    | 2.5   |
| <b>2(90 K)</b>                   | 31.2  | 23.5  | 8.5    | -     | 16.2  | 1.3   | 12.3  | 4.3    | -     | 1.1    | 0.2   |
| <b>3(100 K)</b>                  | 32.2  | 17.3  | 7.8    | 8.7   | 17.1  | 1.2   | 7.9   | 3.5    | 0.7   | 0.6    | 3.0   |
| <b>3(300 K)</b>                  | 28.3  | 14.5  | 8.9    | 13.8  | 15.8  | 2.0   | 9.4   | 3.8    | 1.4   | 0.2    | 1.9   |
| <b>3·0.6H<sub>2</sub>O (150)</b> | 25.8  | 21.0  | 7.4    | 8.5   | 12.5  | 2.1   | 13.1  | 5.8    | 0.1   | 0.6    | 3.1   |
| <b>4(100 K)</b>                  | 18.0  | 16.2  | 8.4    | 11.5  | 12.1  | 1.5   | 8.2   | 0.9    | 7.6   | 0.4    | 15.2  |
| <b>4(300 K)</b>                  | 19.0  | 16.3  | 8.4    | 11.3  | 10.8  | 1.5   | 8.0   | 1.0    | 8.2   | 0.3    | 15.2  |

**Table S12** Parameters of **1-3** derived from the domain model

|                                                    | <b>1</b> | <b>2</b> | <b>3</b> |
|----------------------------------------------------|----------|----------|----------|
| n                                                  | 8.599    | 10.07    | 6.122    |
| $\Delta S$ (J·mol <sup>-1</sup> ·K <sup>-1</sup> ) | 28.82    | 8.964    | 16.14    |

**Table S13** List of the Fe<sup>III</sup> SCO complexes with the Hqnal ligand without any substituent groups.

| Compound                                                               | Type of SCO                 | T <sub>1/2</sub>                                         | ref |
|------------------------------------------------------------------------|-----------------------------|----------------------------------------------------------|-----|
| [Fe(qnal) <sub>2</sub> ][Pd(dmit) <sub>2</sub> ] <sub>5</sub> ·Acetone | abrupt                      | T <sub>1/2</sub> = 220 K                                 | S1  |
| [Fe(qnal) <sub>2</sub> ]CF <sub>3</sub> SO <sub>3</sub> ·MeOH          | Abrupt with hysteresis loop | T <sub>1/2</sub> ↑ = 115 K<br>T <sub>1/2</sub> ↓ = 104 K | S2  |
| [Fe(qnal) <sub>2</sub> ]CF <sub>3</sub> SO <sub>3</sub> ·acetone       | abrupt with hysteresis loop | T <sub>1/2</sub> ↑ = 133 K<br>T <sub>1/2</sub> ↓ = 130 K | S2  |
| [Fe(qnal) <sub>2</sub> ](NS)                                           | abrupt with hysteresis loop | T <sub>1/2</sub> ↑ = 219 K<br>T <sub>1/2</sub> ↓ = 188 K | S3  |
| [Fe(qnal) <sub>2</sub> ]PS·MeOH·CH <sub>2</sub> Cl <sub>2</sub>        | abrupt                      | T <sub>1/2</sub> = 220 K                                 | S3  |
| [Fe(qnal) <sub>2</sub> ]NO <sub>3</sub>                                | low spin                    | -                                                        | S4  |
| [Fe(qnal) <sub>2</sub> ]BPh <sub>4</sub> ·DCM                          | gradual                     | T <sub>1/2</sub> = 285 K                                 | S4  |
| [Fe(qnal) <sub>2</sub> ]NCS                                            | gradual                     | T <sub>1/2</sub> = 340 K                                 | S4  |

## Notes and references

- S1. K. Takahashi, H.-B. Cui, Y. Okano, H. Kobayashi, H. Mori, H. Tajima, Y. Einaga and O. Sato, *J. Am. Chem. Soc.*, 2008, **130**, 6688-6689.
- S2. T. Shimizu, Y. Komatsu, H. Kamihata, Y. H. Lee, A. Fuyuhiko, S. Iijima and S. Hayami, *J. Incl. Phenom. Macrocycl. Chem.*, 2011, **71**, 363-369.
- S3. A. Tsukiashi, M. Nakaya, F. Kobayashi, R. Ohtani, M. Nakamura, J. M. Harrowfield, Y. Kim and S. Hayami, *Inorg. Chem.*, 2018, **57**, 2834-2842.
- S4. W. Thammasangwan, P. Harding, S. G. Telfer, A. Alkas, W. Phonsri, K. S. Murray, R. Clerac, M. Rouzieres, G. Chastanet and D. J. Harding, *Eur. J. Inorg. Chem.*, 2020, **14**, 1325-1330.
